# Supplementary material for: Metabolic Reprogramming in SARS-CoV-2 Infection Impacts the Outcome of COVID-19 Patients
Source: PubMed Central journal article supplement (PMC9634751; doi:10.3389/fimmu.2022.936106), 2022-07-11
Supplement: Image_1.pdf [file Image_1.pdf]

## Supplementary Material

### 1 Supplementary Figures

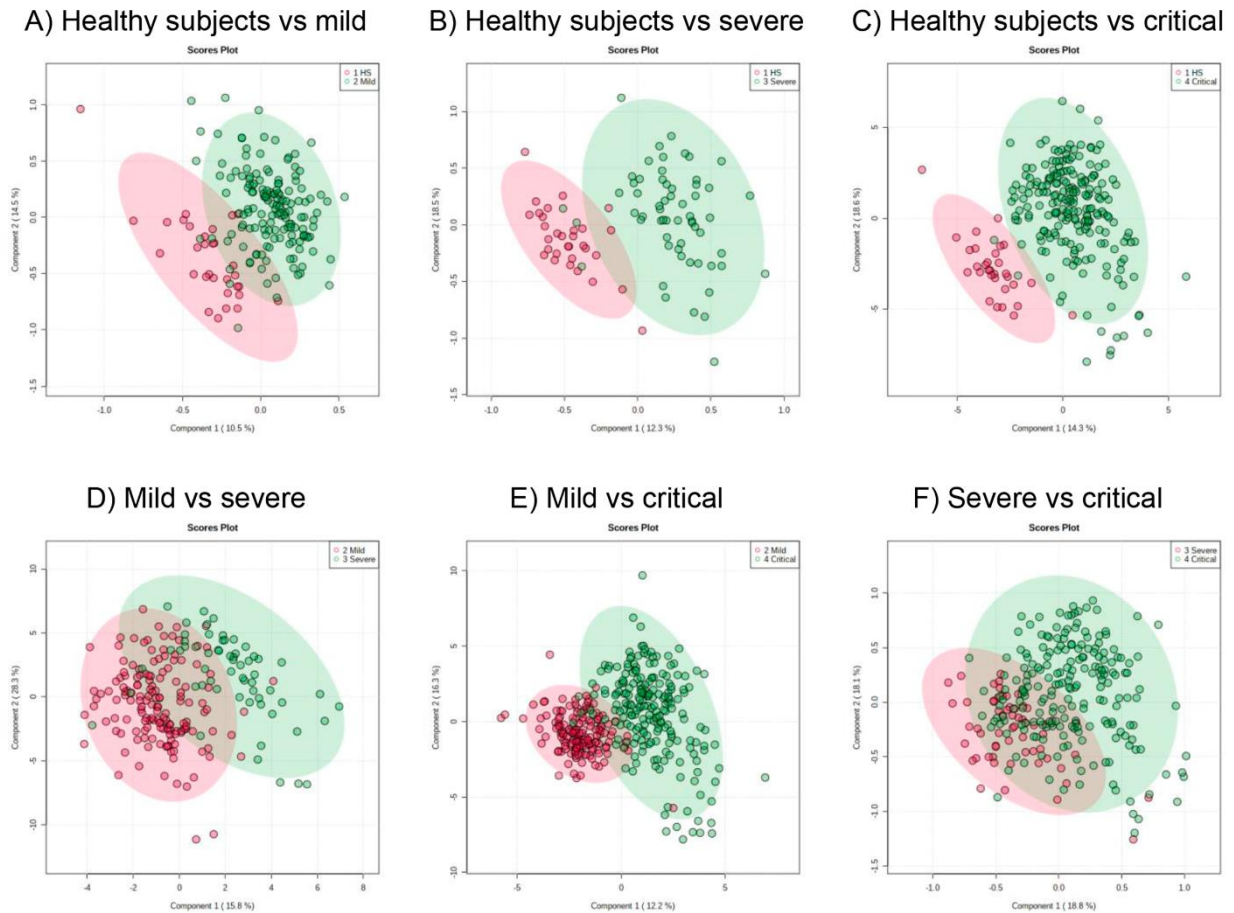

**Supplementary Figure 1.** Two-dimensional score plots of selected principal components, according to disease severity. The explained variances are shown in brackets
